# Supplementary material for: Novel P2X7 Antagonist Ameliorates the Early Phase of ALS Disease and Decreases Inflammation and Autophagy in SOD1-G93A Mouse Model
Source: MDPI journal article supplement (doi:10.3390/ijms221910649), 2021-09-30
Supplement: s1 [file s1]

**Table S1. Behavioural comparison between Captisol® solution-treated and untreated SOD1-G93A mice**

|                            | SOD1-G93A<br>+ Captisol® solution<br>( vehicle of AXX71) | SOD1-G93A<br>+ Captisol® solution<br>(vehicle of AXX13) | SOD1-G93A |
|----------------------------|----------------------------------------------------------|---------------------------------------------------------|-----------|
| <b>Onset<br/>(days)</b>    | 121.3 ± 7.5                                              | 123 ± 4.06                                              | 122 ± 5.6 |
| <b>Survival<br/>(days)</b> | 169.6 ± 9.76                                             | 171.4 ± 13.3                                            | 172 ± 7.3 |

**Table S2. Biochemical comparison between Captisol® solution-treated and untreated SOD1-G93A mice**

|                                          | SOD1-G93A<br>+ Captisol® solution | SOD1-G93A   |
|------------------------------------------|-----------------------------------|-------------|
| <b>ARG1</b> ( <i>RT-PCR</i> )            | 1.5 ± 0.8                         | 1.4 ± 0.3   |
| <b>BDNF</b> ( <i>RT-PCR</i> )            | 0.8 ± 0.3                         | 0.5 ± 0.3   |
| <b>CD68</b> ( <i>WB</i> )                | 7 ± 0.8                           | 5 ± 2       |
| <b>GFAP</b> ( <i>WB</i> )                | 5 ± 1.3                           | 4.8 ± 0.8   |
| <b>gp91<sup>phox</sup></b> ( <i>WB</i> ) | 3 ± 0.2                           | 4 ± 0.2     |
| <b>IL-1β</b> ( <i>RT-PCR</i> )           | 9 ± 0.3                           | 9.5 ± 1.5   |
| <b>IL-10</b> ( <i>RT-PCR</i> )           | 0.6 ± 0.4                         | 0.4 ± 0.2   |
| <b>LC3B-II</b> ( <i>WB</i> )             | 2.1 ± 0.2                         | 3 ± 0.4     |
| <b>Motor Neuron</b> ( <i>IHC</i> )       | 0.34 ± 0.056                      | 0.33 ± 0.12 |
| <b>NOX2</b> ( <i>RT-PCR</i> )            | 18 ± 0.05                         | 16 ± 2      |
| <b>NF-κB</b> ( <i>WB</i> )               | 1.9 ± 0.25                        | 2.2 ± 0.4   |
| <b>P2X7</b> ( <i>WB</i> )                | 3 ± 0.8                           | 2.4 ± 0.1   |
| <b>SQSTM1/p62</b> ( <i>WB</i> )          | 1.7 ± 0.2                         | 1.8 ± 0.5   |

The table lists the behavioural (Table S1) and biochemical (Table S2) parameters in Captisol® solution-treated *vs* untreated SOD1-G93A mice. In B values are represented as fold changes with respect to WT mice. Results for untreated SOD1-G93A mice derive from historical data collected in the laboratory. RT-PCR= real time-PCR; WB= western blot; IHC= immunohistochemistry.
